# Supplementary material
Source: PubMed Central journal article supplement (PMC6737252)
Supplement: NIHMS1538471-supplement-1.pdf [file NIHMS1538471-supplement-1.pdf]

1 Supplement A. Description of variables used in the inverse probability of treatment weights  
2 (IPTW).

3 **Food and water insecurity**

4 *Water insecurity*: this is a composite of several variables related to water:

- 5 1. In the past 30 days, how often did you worry about whether your household would have  
6 enough water for all of its needs?
- 7 2. In the past 30 days, how often did you or any household members collect water for  
8 drinking from an undesirable or dirty water source because you could not collect water  
9 from a preferred or clean source?
- 10 3. In the past 30 days, how often did you or any household members drink water that you  
11 thought might not be safe for health?
- 12 4. In the past 30 days, how often did you or any household members drink less water than  
13 you needed because there was not enough water or because it was too difficult to collect  
14 more water?
- 15 5. In the past 30 days, how often did you or any household members use less water than  
16 you needed because there was not enough water or because it was too difficult to collect  
17 more water?
- 18 6. In the past 30 days, how often was there no water at all in your household because it  
19 was too difficult to collect more water?
- 20 7. In the past 30 days, how often did you or any household members go to sleep at night  
21 thirsty because there was not enough water?

22 8. In the past 30 days, how often did you feel angry or frustrated about not having enough  
23 water for the household?

24 Each question was answered on a 0-3 scale, 0 meaning never, 1 meaning rarely, 2 meaning  
25 sometimes, and 3 meaning often. Total score was calculated by summing all questions. This  
26 total score was then quintiled.

27 *Food insecurity*: this is a composite of several variables related to food:

28 1. In the past 30 days, how often was there no food at all in your household because you  
29 lacked money to purchase more?

30 2. In the past 30 days, how often did you or any household members go to sleep at night  
31 hungry because there was not enough food?

32 3. In the past 30 days, how often did you or any household members go a whole day  
33 without eating anything because there was not enough food?

34 Each question was answered on a 0-3 scale, 0 meaning never, 1 meaning rarely, 2 meaning  
35 sometimes, and 3 meaning often. Total score was calculated by summing all questions. This  
36 total score was then quintiled.

### 37 **Alcohol use**

38 This variable measured whether or not the survey participant was a heavy drinker. The heavy  
39 drinker variable was created using three measures of alcohol use, including bingeing (“In the  
40 past year, did you ever take 6 or more drinks in a single morning, afternoon, or night?”),  
41 spending on alcohol (“In the past 30 days, did you yourself spend more than 25,000 US\$ on any  
42 kind of alcohol?”), and time spent intoxicated (“In the past 30 days, did you experience

43 drunkenness or intoxication on 3 or more of those days?”). A “Yes” answer to any of those three  
44 questions classified the respondent as a heavy drinker.

#### 45 **Household asset ownership**

46 The household asset index was created through principal components analysis, including  
47 ownership of land (number of plots), a radio, a lantern, a bike, a television, an electric iron, a  
48 *boda-boda* (motorcycle), a refrigerator, a stove, a car, a ventilated improved pit latrine, cement  
49 walls, and cement floors. The household asset index did not include variables with many  
50 missing observations (number of cows, number of goats, number of chickens, ownership of a  
51 mobile phone, number of rooms in house, ownership of a rainwater harvesting tank). The  
52 household asset index was then quintiled.

#### 53 **Sex**

54 Self-reported sex of the survey respondent.

#### 55 **Age**

56 Age of the survey respondent categorized as 17, 18-25, 26-35, 36-45, 46-55, or 56 years and  
57 older.

#### 58 **Marital status**

59 Self-reported marital status of the survey respondent (married/cohabitating, single/never  
60 married or separated/divorced/widowed).

#### 61 **Village of residence**

62 Village of residence of the survey respondent (Buhingo, Bushenyi, Nyamikanja I, Bukuna II,  
63 Nyakabare, Bukuna I, Rwembogo, or Nyamikanja II).

64 **Distance from the HF**

65 This variable measured the distance between the survey respondent's village and the health fair  
66 site. There were three different health fair sites, each occurring on a different day. Using the  
67 registration day of the respondent to determine which health fair site they attended, and the  
68 coordinates of the respondent's village, distance between respondent village and health fair site  
69 was calculated using Stata's geodist command. The latitude and longitude of all three health fair  
70 sites were averaged to compute average village to health fair distances, and this was used to fill  
71 in the missing values for respondents who did not attend the health fair.

72 **Difference between the altitude of the household residence and the altitude of the HF**

73 This variable measured the altitude between the survey respondent's village and the health fair  
74 site. There were three different health fair sites, each occurring on a different day. Using the  
75 registration day of the respondent to determine which health fair site they attended, and the  
76 altitude of the respondent's village, altitude between respondent village and health fair site was  
77 calculated. The altitudes of all three health fair sites were averaged to compute average village  
78 to health fair altitude differences, and this was used to fill in the missing values for respondents  
79 who did not attend the health fair.

80 **Educational attainment**

81 Educational attainment category of the survey respondent (none; some primary, P1-P6;  
82 completed primary, P7-P8; more than primary, S1-S6, vocation, or university).

83 **Self-reported HIV status**

84 Self-reported HIV status of the survey respondent (positive or negative).

85 **Self-reported overall health**

86 Self-reported overall health of the survey respondent (very good, good, bad, or very bad).

87 **Social network size**

88 This variable measured the survey respondent's social network size. The survey respondent  
89 was asked to name up to six people (18 years or older) in five categories (up to 30 people total)  
90 that they share some sort of social relationship with. The categories included people with whom  
91 the survey respondent spent time for leisure, enjoyment, or relaxation; people with whom the  
92 survey respondent discussed any kind of money matters; people to whom the survey  
93 respondent had gone to for emotional support; people with whom the survey respondent  
94 discussed any kind of health issue; and people with whom the survey respondent shared,  
95 borrowed, received, or exchanged any food. The number of people named by the survey  
96 respondent was used as an approximate measure for social network size.

97 **Index of social participation**

98 This variable measured the survey respondent's social participation through counting the  
99 number of social groups the respondent is a part of. This included vocational groups, positive  
100 living groups (for HIV positive people), local council committees, water committees, VHT  
101 groups, NAADS groups, revolving fund/SACCO/any other registered savings groups, church or  
102 other religious groups, women's groups, and gardening committees.

103

104 Supplementary table 1: Comparison of population estimates based on weightings from inverse  
 105 probability of health fair attendance models versus true population statistics

| <b>Characteristic</b>               | <b>Weighted Estimate (95%CI)</b> | <b>True Population Estimate</b> |
|-------------------------------------|----------------------------------|---------------------------------|
| Lifetime Consumption of Alcohol (%) |                                  |                                 |
| Never                               | 42.3 (36.3-48.5)                 | 40.9                            |
| >5 years ago                        | 17.2 (13.9-21.0)                 | 17.5                            |
| 1-5 years ago                       | 11.3 (7.7-16.4)                  | 9.8                             |
| <1 year ago                         | 29.2 (24.9-34.0)                 | 31.7                            |
| Waist Circumference (cm)            | 85.6 (84.1-87.1)                 | 85.3                            |
| Self-Reported HIV Status (%)        | 8.3 (6.1-11.1)                   | 8.7                             |
| Self-Reported Happiness (%)         |                                  |                                 |
| Not happy                           | 17.0 (13.9-20.7)                 | 17.3                            |
| Fairly happy                        | 70.6 (64.3-76.2)                 | 72.4                            |
| Very happy                          | 12.4 (7.5-19.8)                  | 10.0                            |

106

107

108 Supplementary Table 2: Comparison of characteristics of participants with and without ECG  
109 data

| <b>Characteristic</b>                | <b>With ECG Data (n=828)</b> | <b>Missing ECG Data (n=28)</b> | <b>p-value</b> |
|--------------------------------------|------------------------------|--------------------------------|----------------|
| Age (years)                          | 43.9 (42.7 – 45.1)           | 44.7 (38.0 – 51.30)            | 0.822          |
| Male Sex                             | 37.1% (n=306)                | 50.0% (n=14)                   | 0.2            |
| Body Mass Index (kg/m <sup>2</sup> ) | 24.7 (24.3 – 25.0)           | 24.1 (22.7 – 25.4)             | 0.524          |
| Diabetes Mellitus                    | 2.8 (1.6 – 3.9)              | 0 (n=0)                        | 0.428          |
| Hypertension                         | 15.2 (12.8 – 17.7)           | 13.8 (1.2 – 26.3)              | 0.833          |
| Prior *AMI or Heart Failure          | 5.6 (4.0 – 7.1)              | 6.9 (-2.3 – 1.6)               | .758           |
| Prior Stroke                         | 2.7 (1.6 – 3.8)              | 3.5 (-3.2 – 11.0)              | 0.796          |

110

111 \*AMI – acute myocardial infarction

112

113 Supplementary Table 3: Characteristics of Health Fair Attendees versus Non-attendees

| Characteristic                | Attendees (n = 829) | Non-attendees (n = 928) | p-value |
|-------------------------------|---------------------|-------------------------|---------|
| Sex                           |                     |                         |         |
| Female                        | 62.4%               | 48.6%                   | <0.001  |
| Age (years)                   | 43.6 (42.3 -44.8)   | 34.1 (33.1 – 35.1)      | <0.001  |
| ≤30 years (%)                 | 4.3%                | 16.5%                   |         |
| 30-50 years (%)               | 65.6%               | 69.5%                   |         |
| >50 years                     | 30.1%               | 14.0%                   | <0.000  |
| Formal educational attainment |                     |                         |         |
| None                          | 18.5%               | 11.7%                   |         |
| Some primary education        | 34.2%               | 23.1%                   |         |
| Completed primary education   | 23.5%               | 20.9%                   |         |
| At least secondary education  | 23.8%               | 44.4%                   | <0.001  |
| Self-Reported Health          |                     |                         |         |
| Very bad                      | 1.4%                | 0.7%                    |         |
| Bad                           | 26.5%               | 13.1%                   |         |
| Good                          | 59.6%               | 71.1%                   |         |
| Very Good                     | 12.6%               | 15.0%                   | <0.001  |

114

115



116 Supplementary Table 5: ECG Outcomes Presented with Weights Trimmed at the 5th and 95<sup>th</sup>  
117 Percentile

| <b>ECG Finding</b>               | <b>Study Sample Estimates<br/>(n=828)</b> | <b>Trimmed Weight Population<br/>Estimate (95% CI)</b> |
|----------------------------------|-------------------------------------------|--------------------------------------------------------|
| Normal ECG (%)                   | 68.1                                      | 68.8 (65.0 - 72.3)                                     |
| *IVCD (%)                        | 0.7                                       | 0.9 (0.3 – 2.2)                                        |
| Left Ventricular Hypertrophy (%) | 1.7                                       | 1.3 (0.8 – 2.3)                                        |
| Left Bundle Branch Block (%)     | 0.7                                       | 0.8 (0.3 – 2.1)                                        |
| Q Wave Myocardial Infarction (%) | 1.2                                       | 0.9 (0.5 – 1.8)                                        |
| Right Bundle Branch Block (%)    | 1.1                                       | 1.2 (0.5 – 2.6)                                        |

118

119 \*IVCD – interventricular conduction delay

120
